# Supplementary material for: A series of metal–organic frameworks based on 5-(4-pyridyl)-isophthalic acid: selective sorption and fluorescence sensing
Source: Royal Society of Chemistry journal article supplement (doi:10.1039/c4ta01900h), 2014-05-28
Supplement: c4ta01900h1.pdf [file c4ta01900h1.pdf]

# A Series of Metal-Organic Frameworks Based on 5-(4-Pyridyl)-Isophthalic Acid: Selective Sorption and Fluorescence Sensing

Xiaofang Zheng,<sup>†,§</sup> Li Zhou,<sup>†,§</sup> Yumei Huang,<sup>†</sup> Chenggang Wang,<sup>†</sup> Jingui Duan,<sup>‡</sup>

Lili Wen,<sup>\*,†</sup> Zhengfang Tian<sup>&</sup> and Dongfeng Li<sup>\*,†</sup>

<sup>†</sup>Key Laboratory of Pesticide & Chemical Biology of Ministry of Education, College of Chemistry, Central China Normal University, Wuhan, 430079, P. R. China.

<sup>‡</sup> State Key Laboratory of Materials-Oriented Chemical Engineering, Nanjing University of Technology, Nanjing, 210009, P. R. China.

<sup>&</sup> Hubei Key Laboratory for Processing and Application of Catalytic Materials, Huanggang Normal University, Huangguang, 438000, P. R. China.

<sup>§</sup>Xiaofang Zheng and Li Zhou contributed equally to this work

Table S1. Selected Bond Distances (Å) and Angles (deg) for **1-4**.

| <b>1<sup>a</sup></b> |            |             |            |
|----------------------|------------|-------------|------------|
| Ni1–O3               | 1.980(3)   | Ni1–O5      | 2.085(4)   |
| Ni1–O6               | 2.132(3)   | Ni1–O4#1    | 2.058(3)   |
| Ni1–N1#2             | 2.066(4)   | Ni1–O1#3    | 1.984(3)   |
| O1#3–Ni1–O3          | 172.75(15) | O4#1–Ni1–O5 | 176.65(13) |
| O6–Ni1–N1#2          | 178.17(10) |             |            |
| <b>2<sup>b</sup></b> |            |             |            |
| Ni1–O1               | 2.099(2)   | Ni1–O1W     | 2.141(3)   |
| Ni1–O4W              | 2.098(3)   | Ni1–O10     | 2.055(2)   |
| Ni1–N2               | 2.067(3)   | Ni1–O4#1    | 1.961(2)   |
| Ni2–O1W              | 2.140(2)   | Ni2–O5W     | 2.084(2)   |
| Ni2–O9               | 1.994(3)   | Ni2–O13     | 1.998(3)   |
| Ni2–O3#1             | 1.959(3)   | Ni2–N3#2    | 2.090(3)   |

|                      |            |                |            |
|----------------------|------------|----------------|------------|
| Ni3–O2W              | 2.136(2)   | Ni3–O15        | 2.085(2)   |
| Ni3–O17              | 1.981(2)   | Ni3–O25        | 2.054(2)   |
| Ni3–O19#1            | 1.999(2)   | Ni3–N5#3       | 2.094(3)   |
| Ni4–O2W              | 2.130(2)   | Ni4–O6W        | 2.091(2)   |
| Ni4–O16              | 1.996(2)   | Ni4–O21        | 2.021(3)   |
| Ni4–O20#1            | 2.037(2)   | Ni4–N6#4       | 2.099(3)   |
| Ni5–O3W              | 2.135(2)   | Ni5–O7W        | 2.237(3)   |
| Ni5–O24              | 2.014(3)   | Ni5–O12#5      | 1.972(3)   |
| Ni5–O7#6             | 2.067(3)   | Ni5–N4#4       | 2.086(3)   |
| Ni6–O3W              | 2.186(3)   | Ni6–O23        | 2.050(3)   |
| Ni6–N7               | 2.086(3)   | Ni6–O8#6       | 1.998(2)   |
| Ni6–O5#3             | 1.995(2)   | Ni6–N1#3       | 2.116(3)   |
| O1W–Ni1–N2           | 177.05(11) | O4W–Ni1–O10    | 176.74(10) |
| O1–Ni1–O4#1          | 161.27(10) | O9–Ni2–O13     | 175.41(10) |
| O1W–Ni2–N3#2         | 177.68(11) | O3#1–Ni2–O5W   | 175.59(10) |
| O15–Ni3–O25          | 175.40(10) | O2W–Ni3–N5#3   | 177.74(11) |
| O17–Ni3–O19#1        | 172.72(10) | O2W–Ni4–N6#4   | 178.19(11) |
| O6W–Ni4–O20#1        | 177.82(10) | O16–Ni4–O21    | 172.86(10) |
| O3W–Ni5–N4#4         | 177.19(11) | O7#6–Ni5–O7W   | 175.37(10) |
| O12#5–Ni5–O24        | 174.30(11) | O3W–Ni6–N1#3   | 175.48(11) |
| O23–Ni6–N7           | 179.43(12) | O5#3–Ni6–O8#6  | 174.06(11) |
| <b>3<sup>c</sup></b> |            |                |            |
| Co1–N1               | 2.129(3)   | Co1–N5         | 2.148(3)   |
| Co1–O4#1             | 2.155(3)   | Co1–O7#2       | 2.096(3)   |
| Co1–N10#3            | 2.194(3)   | Co2–O1         | 2.055(3)   |
| Co2–O5               | 2.039(3)   | Co2–N8         | 2.121(3)   |
| Co2–N4#4             | 2.135(3)   | Co2–N9#5       | 2.140(3)   |
| N1–Co1–N5            | 173.58(12) | O4#1–Co1–N10#3 | 140.93(10) |
| O7#2–Co1–N10#3       | 131.87(10) |                |            |
| <b>4<sup>d</sup></b> |            |                |            |
| Zn1–O1               | 2.002(4)   | Zn1–N1         | 2.052(7)   |
| Zn1–N2               | 1.999(6)   | Zn1–O1#1       | 2.002(4)   |
| O1–Zn1–N1            | 101.72(18) | O1#1–Zn1–N2    | 110.89(17) |

<sup>a</sup> Symmetry codes for **1**: #1 2-x, y, 1/2-z; #2 2-x, -y, -z; #3 1/2+x, 1/2+y, z

<sup>b</sup> Symmetry codes for **2**: #1 -1+x, y, z; #2 -x, -y, -z; #3 1-x, -y, 1-z; #4 -x, 1-y, 1-z; #5 x, 1+y, 1+z; #6 -x, -y, 1-z

<sup>c</sup> Symmetry codes for **3**: #1 x, y, 1+z; #2 1+x, y, 1+z; #3 1-x, 1/2+y, 3/2-z; #4 -1+x, y, -2+z; #5 1-x,

1/2+y, 1/2-z

<sup>d</sup>Symmetry codes for **4**: #1 x, y, 2-z

Table S2. The kinetic diameter of the adsorbents and their maximum uptakes for activated **3**.

| molecules          | kinetic diameter (Å) | Uptake (cm <sup>3</sup> g <sup>-1</sup> ) |
|--------------------|----------------------|-------------------------------------------|
| water              | 2.64 – 2.9           | 125                                       |
| methanol           | 3.626 – 4.0          | 70                                        |
| ethanol            | 4.3 – 4.53           | 42                                        |
| <i>n</i> -propanol | 4.7                  | 27                                        |
| <i>i</i> -propanol | 4.7                  | 18                                        |

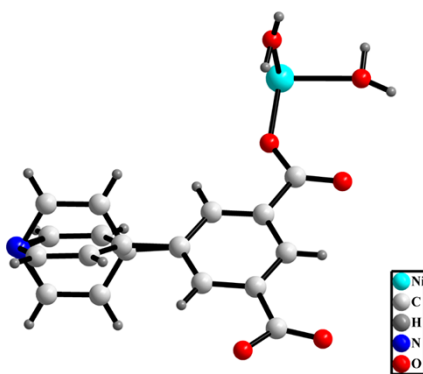

(a)

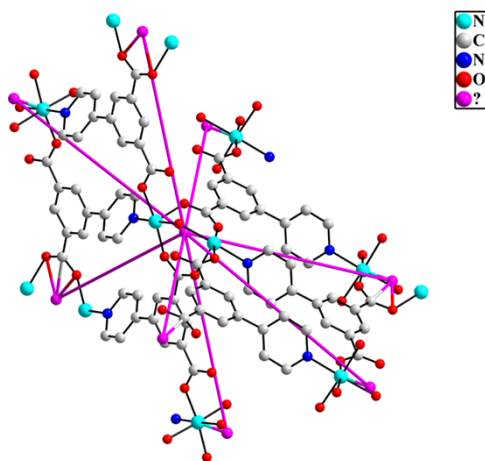

(b)

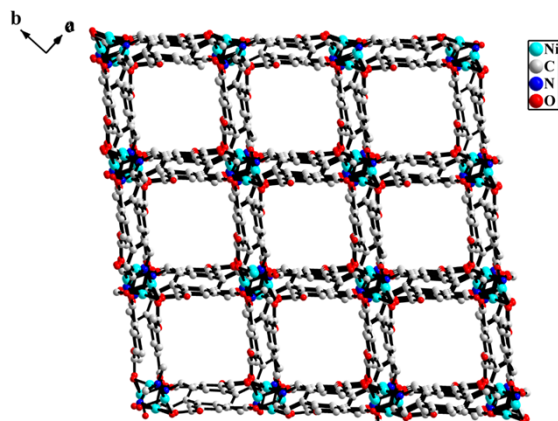

(c)

**Figure S1.** (a) The asymmetric unit of **1**, (b) coordination environment of dimer unit  $[\text{Ni}_2(\text{COO})_2(\mu^2\text{-H}_2\text{O})]$  (violet), viewed as 8-connected node, (c) 3D framework of **1** along  $[1\ 1\ 0]$  directions.

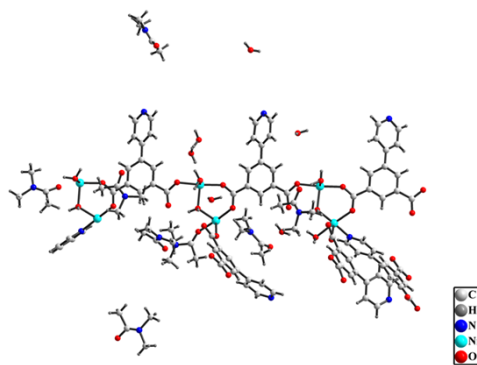

(a)

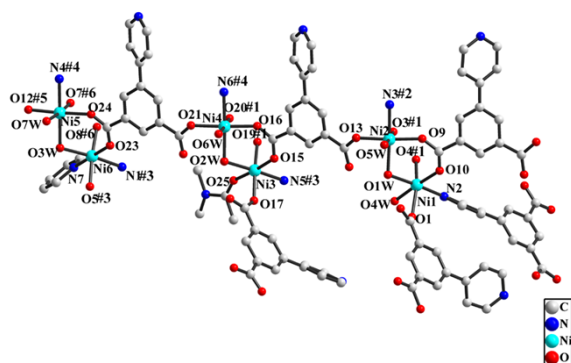

(b)

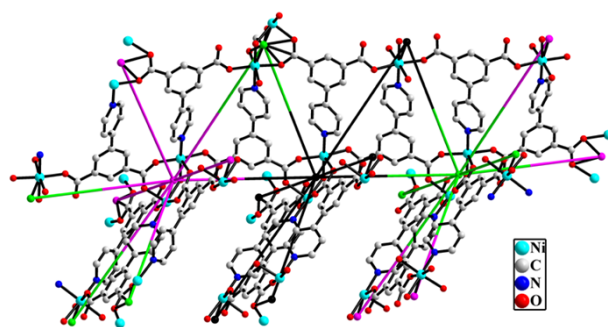

(c)

c  
b, a

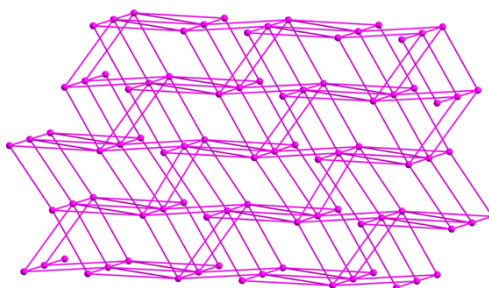

(d)

**Figure S2.** (a) The asymmetric unit of **2**, (b) coordination environment of Ni atom with hydrogen atoms omitted for clarity of **2**, (c) coordination environment of dimer unit  $[\text{Ni}_2(\text{COO})_2(\mu^2\text{-H}_2\text{O})]$  (violet, green and black), viewed as 8-connected node, (d) the topological representation of **2**.

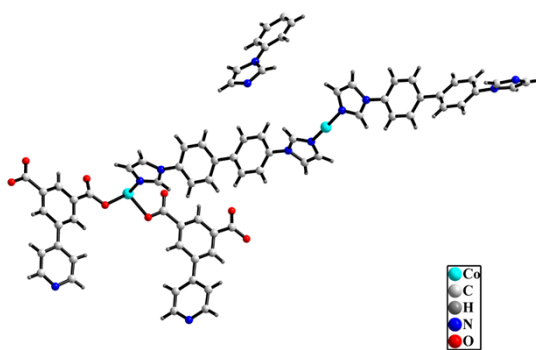

(a)

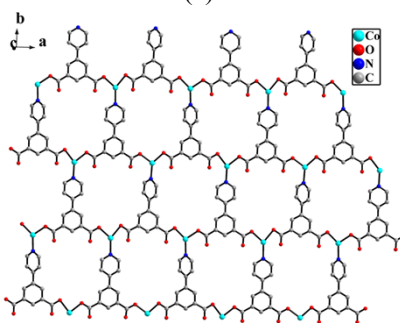

(b)

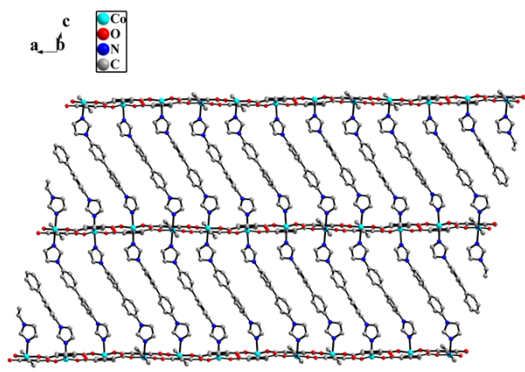

(c)

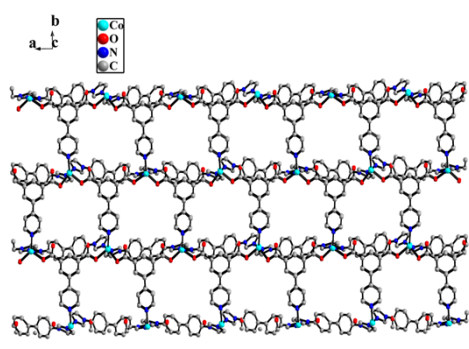

(d)

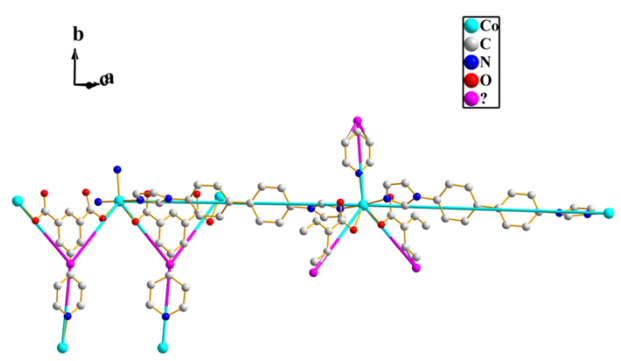

(e)

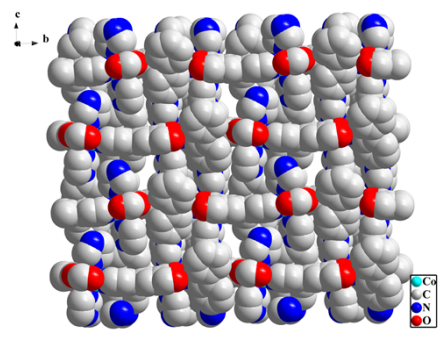

(f)

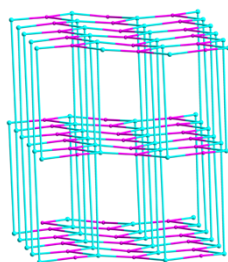

(g)

**Figure S3.** (a) The asymmetric unit of **3**, (b) 2D layer constructed from pbdc<sup>2-</sup> moiety and Co(II) atoms in **3**, (c) and (d) 3D framework of **3** along *b*- and *c*- direction, respectively, (e) coordination environment of Co(II) (blue) and pbdc<sup>2-</sup> (violet), viewed as 5- and 3- connected nodes, respectively, (f) The hexagonal microporous channels along the *a*-axis, (g) the topological representation of binodal (3,5)-connected 3D single network. purple, pbdc<sup>2-</sup> ligand; blue, Co.

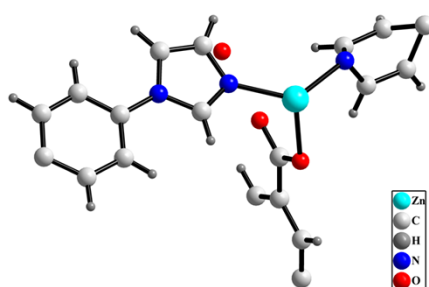

(a)

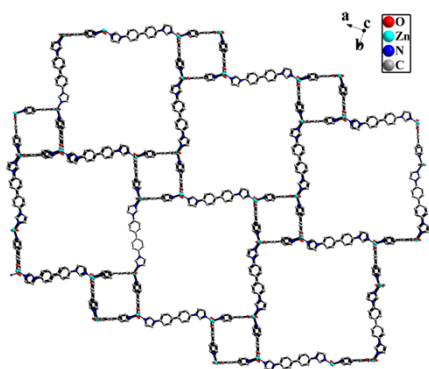

(b)

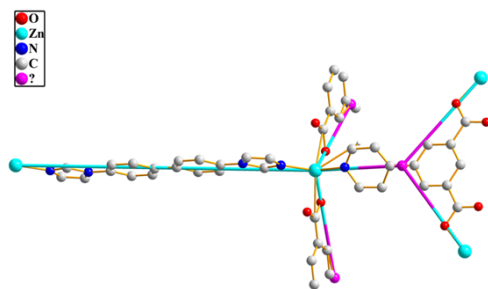

(c)

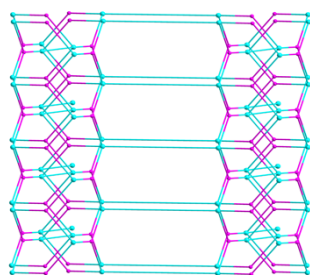

(d)

**Figure S4.** (a) The asymmetric unit of **4**, (b) 3D single framework of **4** along *c*- direction, (c) coordination environment of Zn(II) (blue) and pbdc<sup>2-</sup> (violet), viewed as 4- and 3- connected nodes, respectively, (d) the topological representation of binodal (3,4)-connected 3D single network. purple, pbdc<sup>2-</sup> ligand; blue, Zn1.

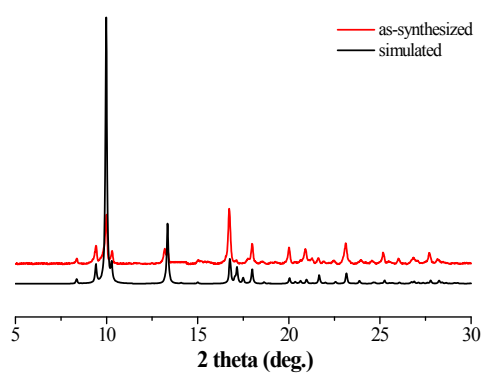

(a)



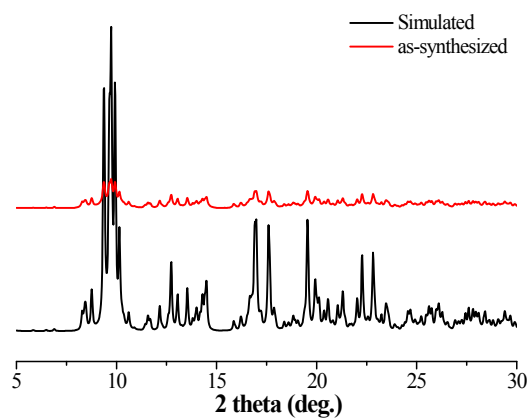

(b)

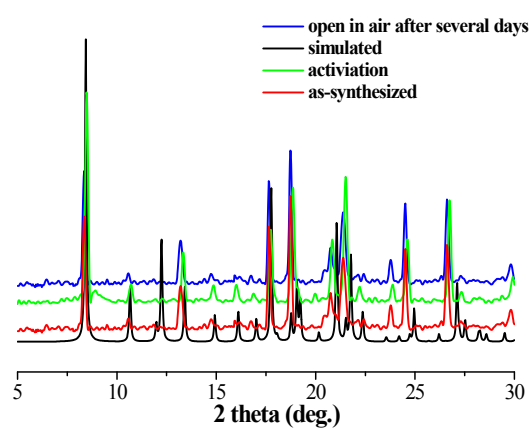

(c)

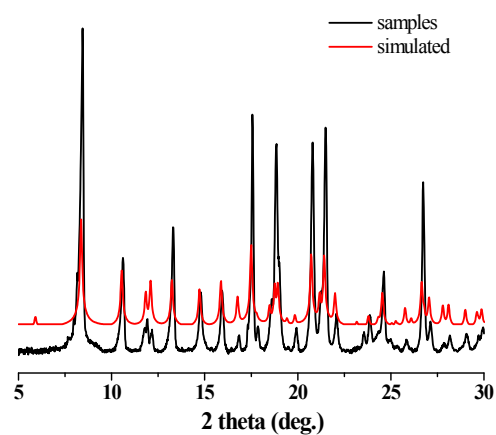

(d)

**Figure S5.** PXRd profiles for complexes **1** (a), **2** (b), **3** (c) and **4** (d). Simulated spectrum was calculated from the single crystal data.

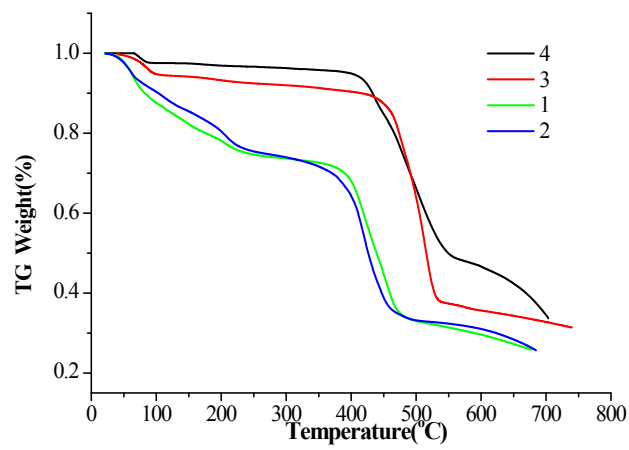

Figure S6. TG curves of complexes 1-4.

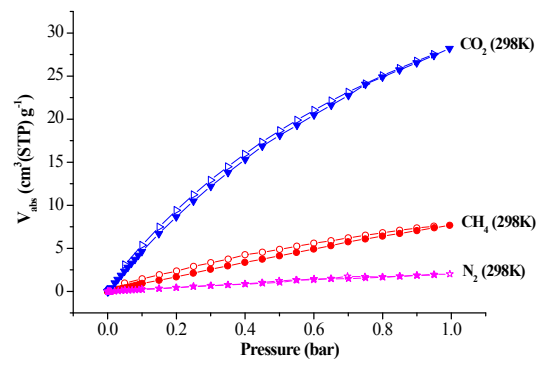

(a)

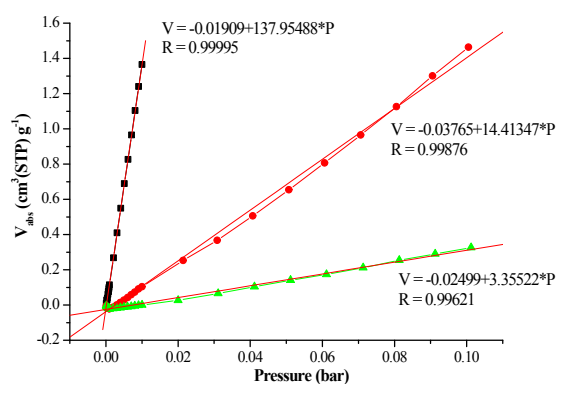

(b)

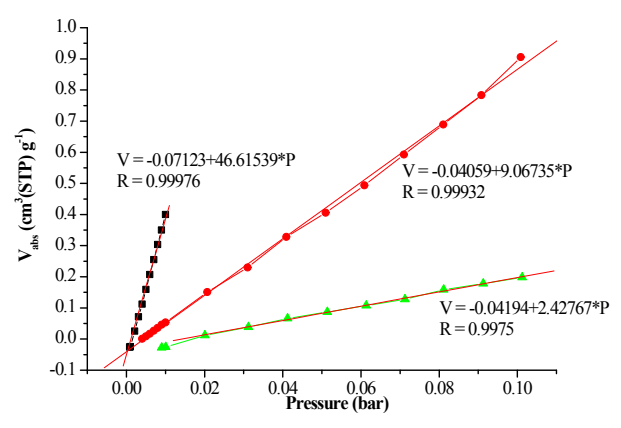

(c)

**Figure S7.** (a) Sorption isotherms for CO<sub>2</sub>, CH<sub>4</sub>, and N<sub>2</sub> at 298 K of desolvated **3** (adsorption and desorption branches are shown with filled and empty shape, respectively). (b) and (c) Evaluation of the initial slope in the Henry region of the sorption isotherms of CO<sub>2</sub> (square), CH<sub>4</sub> (circle), and N<sub>2</sub> (triangle) at 273 and 298 K, respectively. The ratios of the initial slopes allowed an estimation of the sorption selectivity.

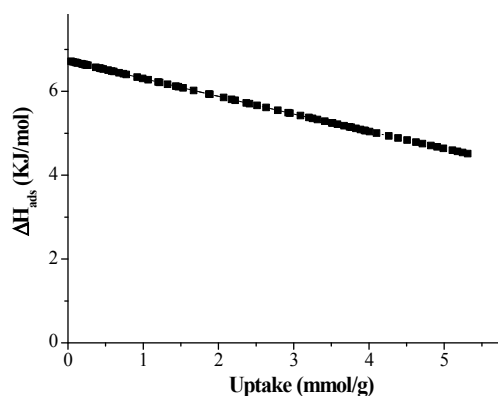

**Figure S8.** The isosteric heats of H<sub>2</sub> adsorption ( $Q_{st}$ ) for desolvated **3**.

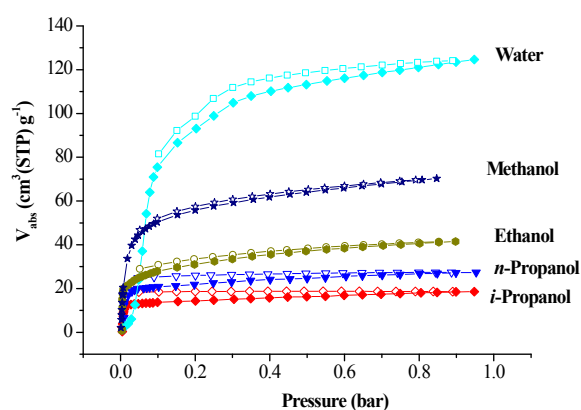

**Figure S9.** Water and alcohol vapor adsorption–desorption isotherms of the desolvated **3**: water, methanol, ethanol and *i*-propanol at 298 K, where filled and open shape represent adsorption and desorption, respectively.

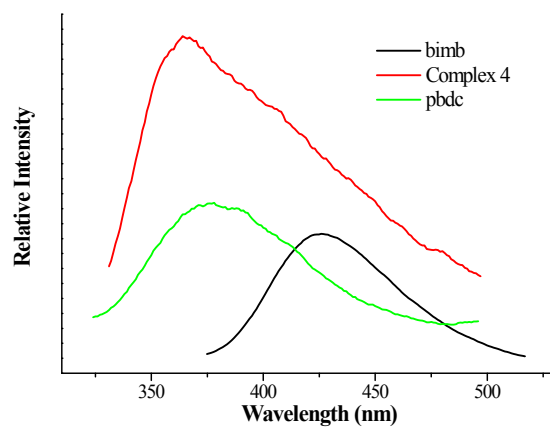

(a)

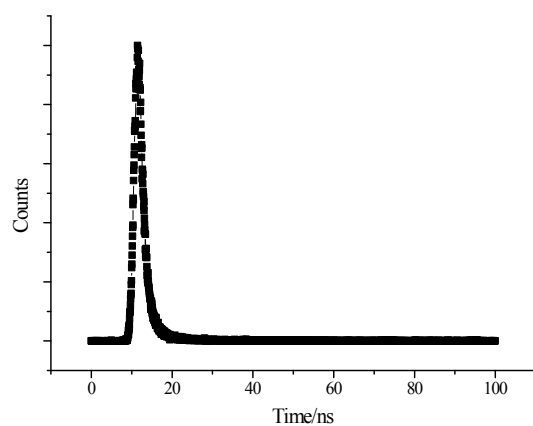

(b)

**Figure S10.** (a) The solid-state fluorescent spectra of **4** and free ligands at room temperature. (b) The emission decay lifetime of compound **4**.

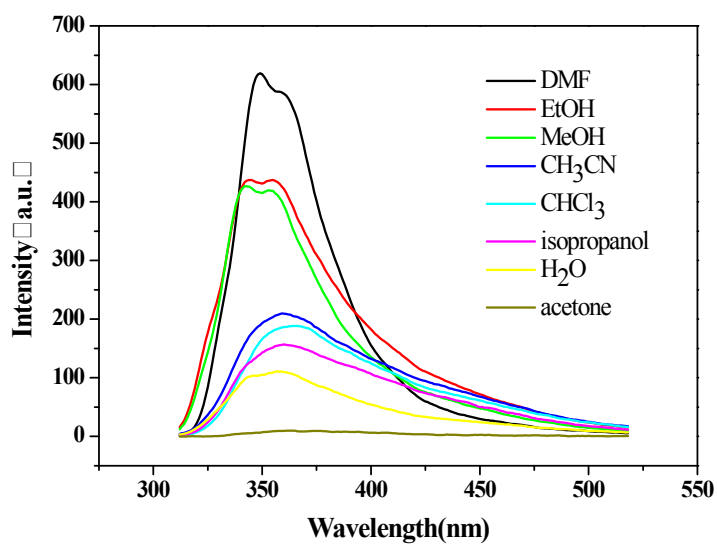

**Figure S11.** The PL spectra of **4** introduced to various pure solvent when excited at 290 nm.

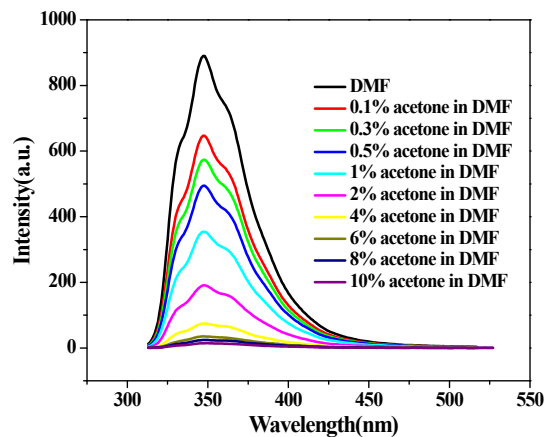

**Figure S12.** The PL spectra of **4** in the presence of various volumes acetone in DMF (excited at 290 nm).

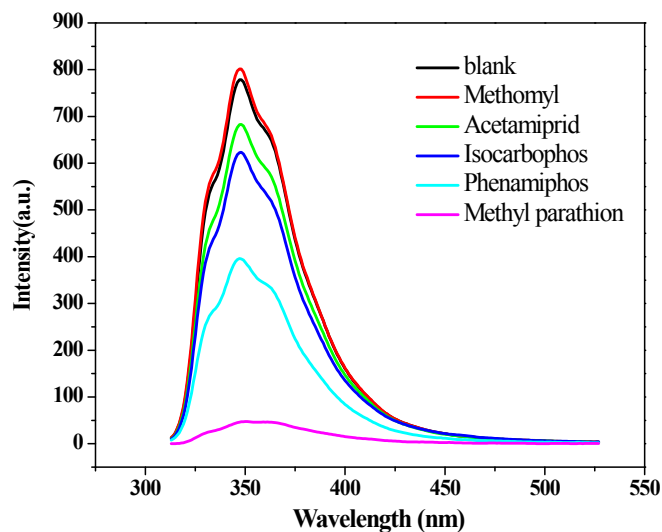

**Figure S13.** The PL intensities of **4** toward relevant pesticides with concentration of  $1 \times 10^{-3}$  M in DMF when excited at 290 nm.

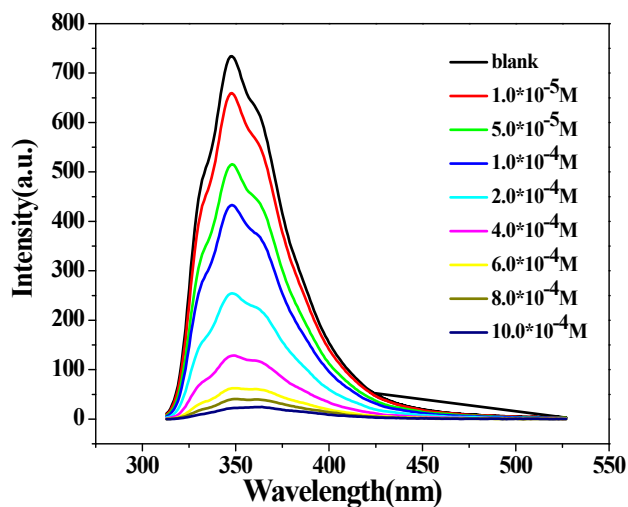

**Figure S14.** The PL intensity of **4** as a function of parathion-methyl at different concentrations in

DMF.

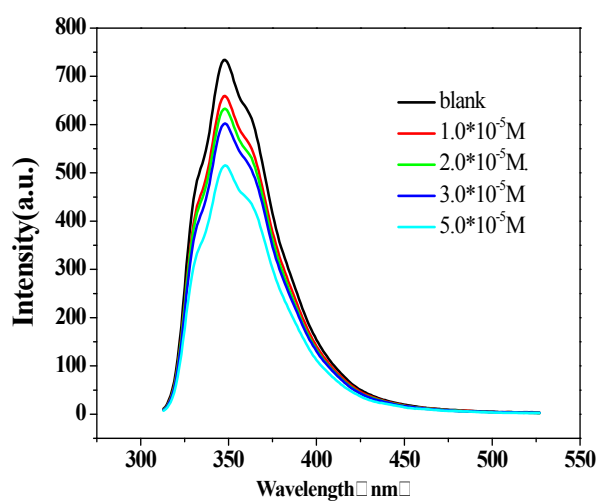

**Figure S15.** The PL intensity of **4** as a function of parathion–methyl at different concentrations in DMF.

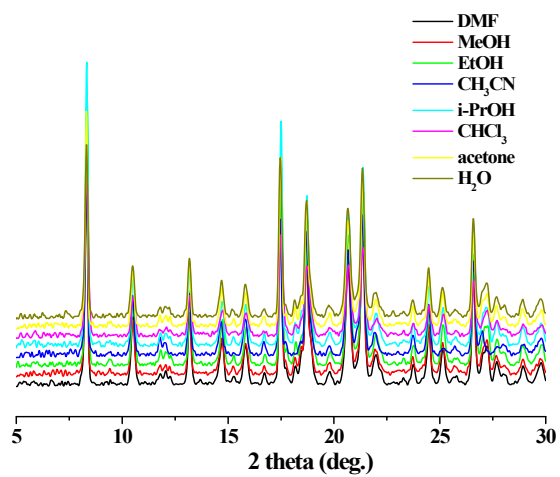

**Figure S16.** PXRD profiles for complexes **4** in different solvents.
